# Supplementary material for: Dry Post Wintertime Mass Surveillance Unearths a Huge Burden of P. vivax, and Mixed Infection with P. vivax P. falciparum, a Threat to Malaria Elimination, in Dhalai, Tripura, India
Source: MDPI journal article supplement (doi:10.3390/pathogens10101259), 2021-09-29
Supplement: s1 [file s1]

## Supplementary File

**Table S1.** Malaria yearly cases and Annual Parasite Incidence (API) along with cases of January to March for Ambassa PHC as reported by the Malaria Program, which includes routine active, passive surveillance, and mass surveillance data.

|         | Ambassa PHC |      |       |     |       |     |
|---------|-------------|------|-------|-----|-------|-----|
|         | 2018        |      | 2019  |     | 2020  |     |
|         | Cases       | API  | Cases | API | Cases | API |
| Yearly  | 1670        | 26.2 | 523   | 8.2 | 322   | 5   |
| Jan–Mar | 38          |      | 65    |     | 9     |     |

**Table S2.** Malaria yearly cases and Annual Parasite Incidence (API) along with cases of January to March and Monthly Parasite Incidence (MPI) for Bidyapara and Dhansinghpara villages. These were based on the data compiled from the reports and registers of health workers and volunteers, which include routine active, passive surveillance, and mass surveillance data.

|               | 2018  |     |       |     |       |      |            |       |
|---------------|-------|-----|-------|-----|-------|------|------------|-------|
|               | Jan   |     | Feb   |     | March |      | Whole Year |       |
|               | Cases | MPI | Cases | MPI | Cases | MPI  | Cases      | API   |
| Bidyapara     | 0     | 0   | 0     | 0   | 1     | 0    | 107        | 570.5 |
| Dhansinghpara | 0     | 0   | 1     | 4.9 | 2     | 40.9 | 348        | 26.2  |
|               | 2019  |     |       |     |       |      |            |       |
|               | Jan   |     | Feb   |     | March |      | Whole Year |       |
|               | Cases | MPI | Cases | MPI | Cases | MPI  | Cases      | API   |
| Bidyapara     | 1     | 2.6 | 1     | 2.6 | 0     | 0    | 21         | 55.4  |
| Dhansinghpara | 2     | 3.2 | 4     | 6.5 | 0     | 0    | 110        | 180.3 |
|               | 2020  |     |       |     |       |      |            |       |
|               | Jan   |     | Feb   |     | March |      | Whole Year |       |
|               | Cases | MPI | Cases | MPI | Cases | MPI  | Case       | API   |
| Bidyapara     | 0     | 0   | 0     | 0   | 0     | 0    | 14         | 36.5  |
| Dhansinghpara | 2     | 3.2 | 4     | 6.3 | 1     | 1.5  | 10         | 15.8  |
|               | 2021  |     |       |     |       |      |            |       |
|               | Jan   |     | Feb   |     | March |      |            |       |
|               | Cases | MPI | Cases | MPI | Cases | MPI  | Cases      | MPI   |
| Bidyapara     | 0     | 0   | 0     | 0   | 2     | 2.5  |            |       |
| Dhansinghpara | 0     | 0   | 1     | 1.6 | 3     | 3.1  |            |       |

**Table S2.** The proportion of *P. vivax* malaria cases as reported in Tripura from 2008 to 2019 (Data source: NHM Tripura Website Available online: <http://tripuranrhm.gov.in/nvbdcg.html>. accessed on 25 March 2015 and 3 April 2021)

| Year | <i>P. Vivax</i> Cases | <i>P. Vivax</i> Proportion (%) |
|------|-----------------------|--------------------------------|
| 2008 | 2306                  | 8.9                            |
| 2009 | 1478                  | 6.1                            |
| 2010 | 1131                  | 4.7                            |
| 2011 | 605                   | 4.2                            |
| 2012 | 650                   | 5.6                            |
| 2013 | 398                   | 5.4                            |
| 2014 | 1587                  | 3.1                            |
| 2015 | 2451                  | 7.5                            |
| 2016 | 1001                  | 9.5                            |
| 2017 | 480                   | 6.8                            |
| 2018 | 479                   | 3.7                            |
| 2019 | 801                   | 6.4                            |
| 2020 | 295                   | 8.7                            |

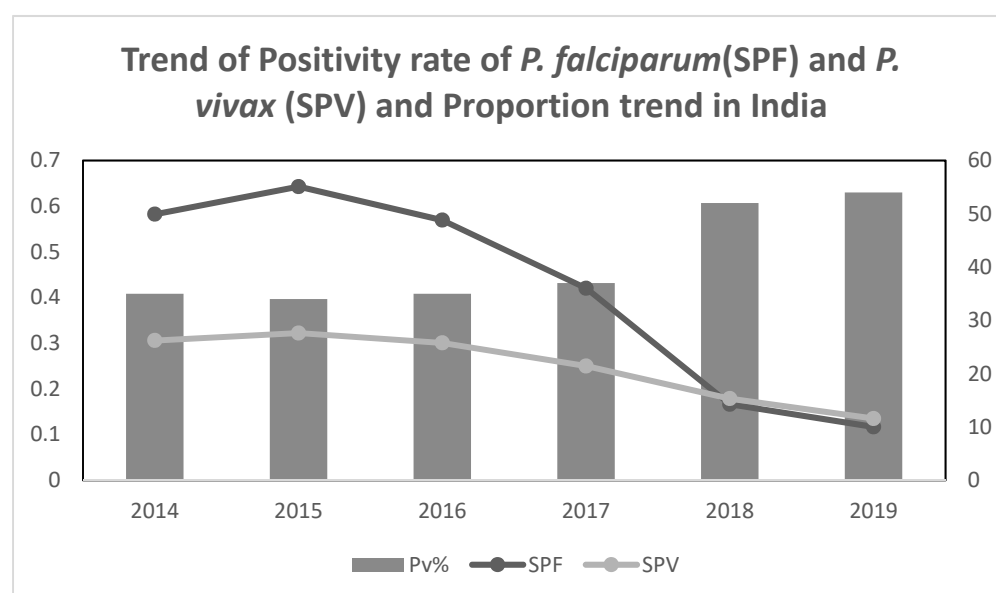

**Figure S1.** Trends of the positivity rate of *P. falciparum* (SPF) and *P. vivax* (SPV). These show that the *P. falciparum* is falling at a much faster rate than that of *P. vivax* and is now lower than SPV. The proportion of *P. vivax* among total malaria cases has increased (Data Source: NVBDCP India, accessed 25 July 2020 and 4 December 2020).
